# Supplementary material
Source: ML conference proceedings conference paper supplement (https://openreview.net/forum?id=vszlHtUvSR)

predator-prey

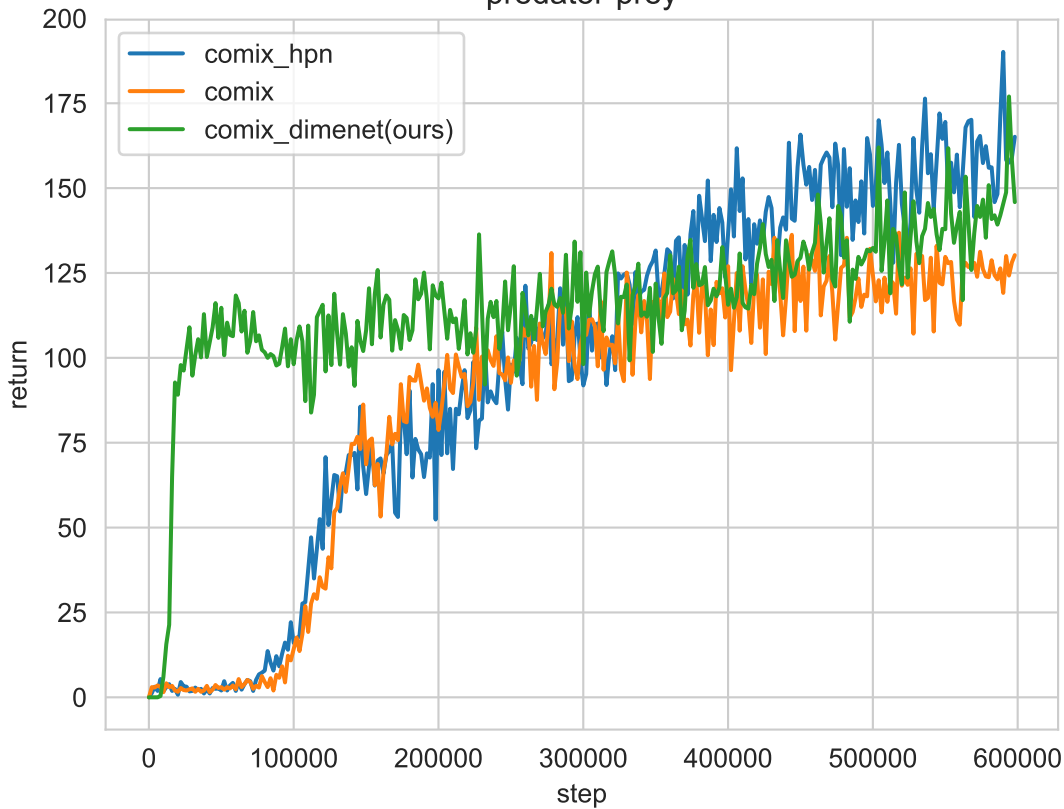

Supplement: supplementary_material [file attachment]

predator-prey

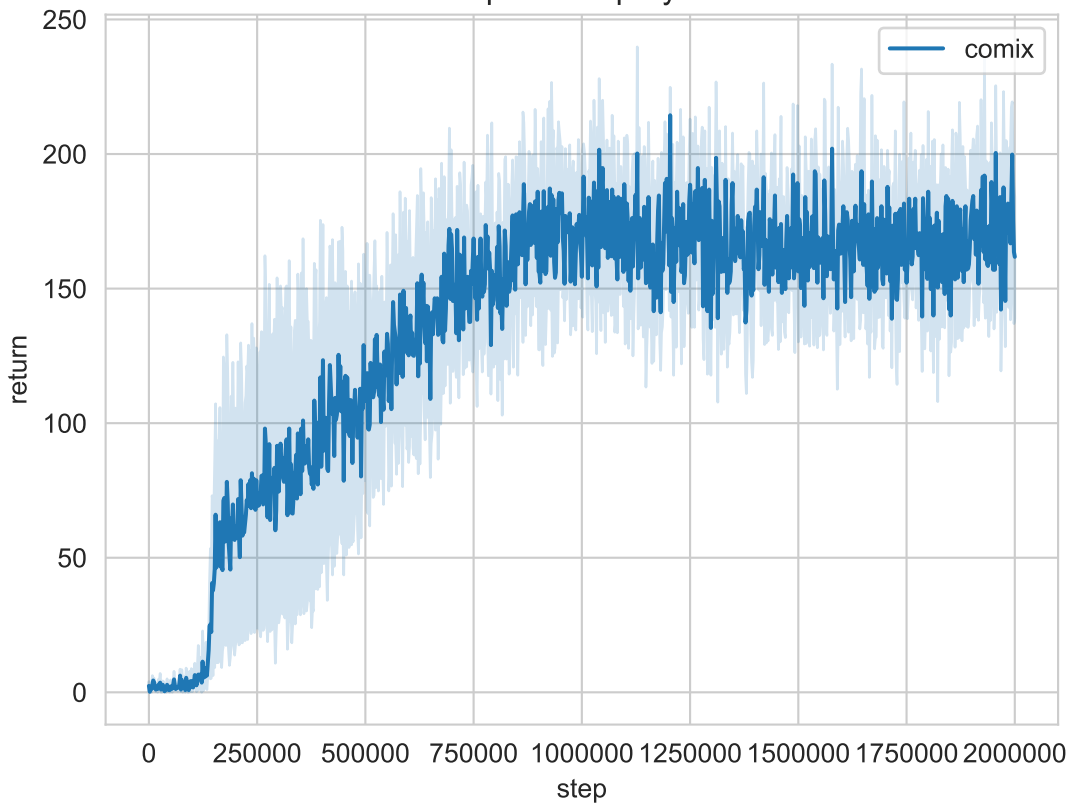

Supplement: supplementary_material [file attachment]

predator-prey

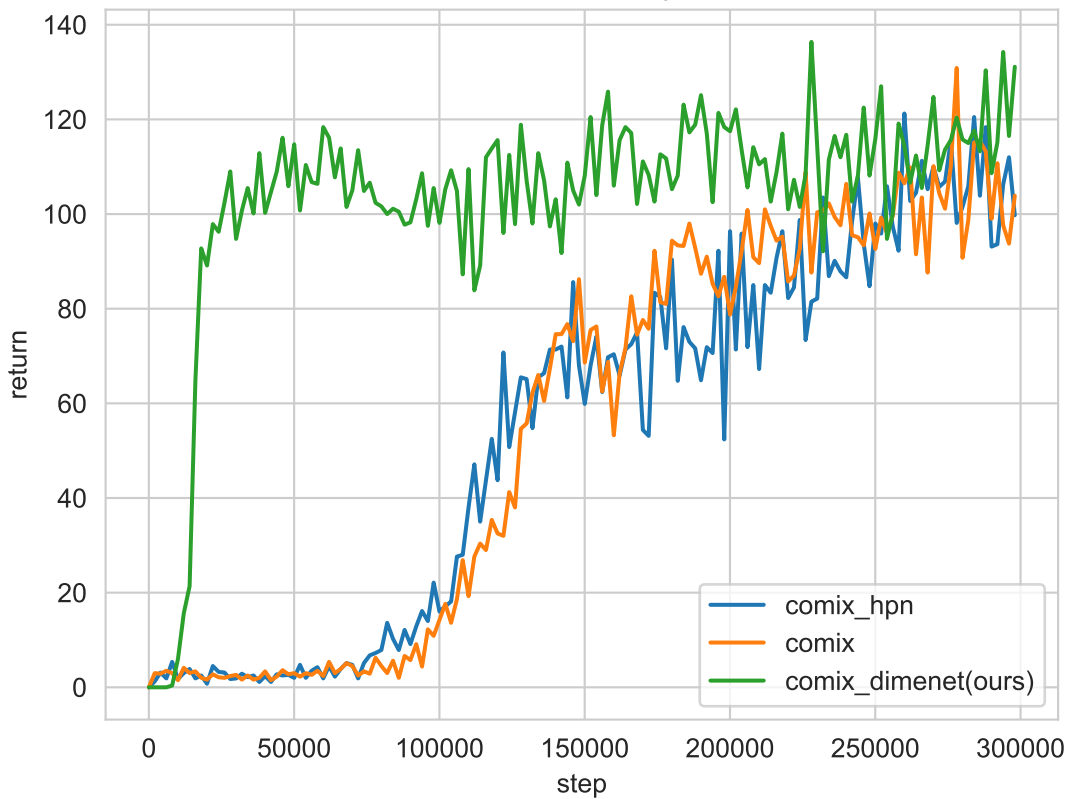

Supplement: supplementary_material [file attachment]

6 predator vs 2 prey

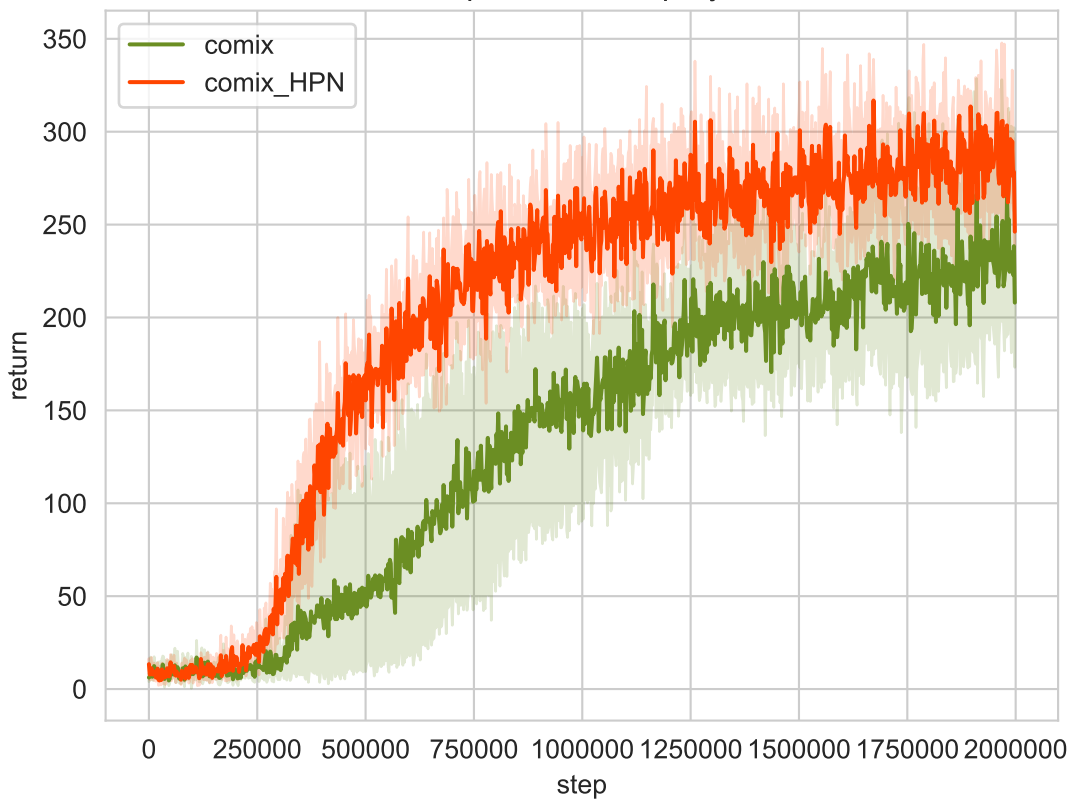

Supplement: supplementary_material [file attachment]

predator-prey

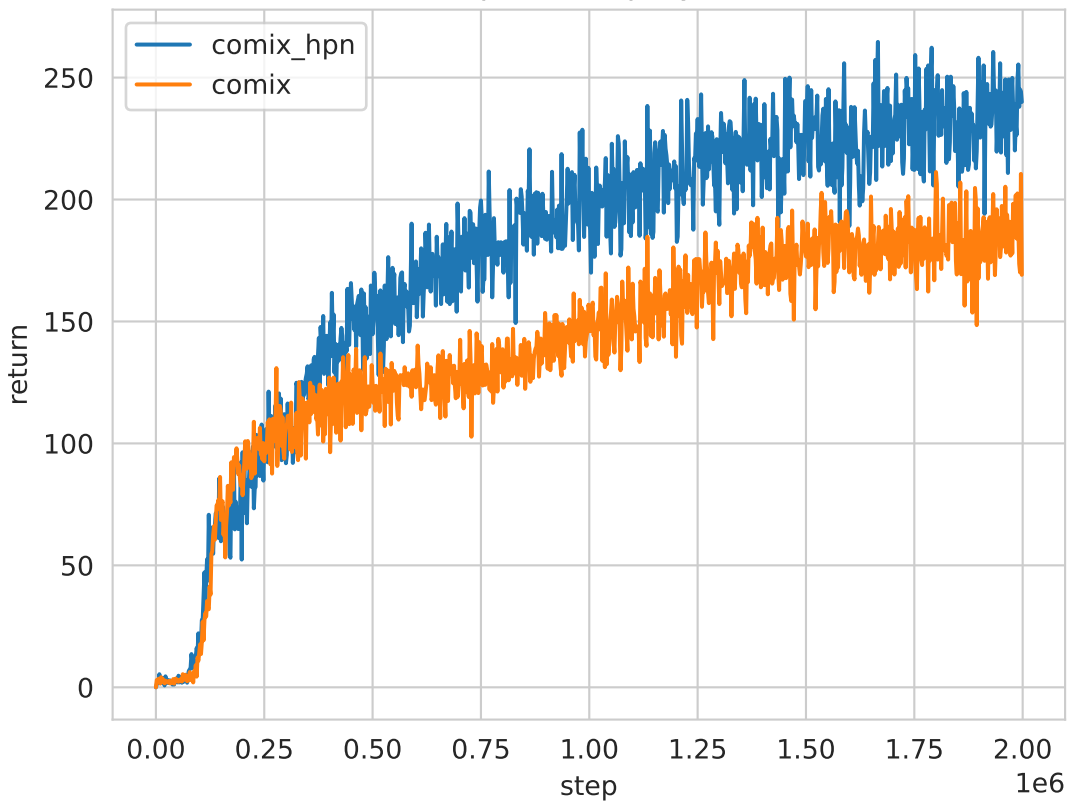

Supplement: supplementary_material [file attachment]
